# Supplementary material for: The Impact of Drying and Rehydration on the Structural Properties and Quality Attributes of Pre-Cooked Dried Beans
Source: MDPI journal article supplement (doi:10.3390/foods10071665), 2021-07-19
Supplement: s1 [file s1]

## Supplementary materials

**Table S1.** Parameter estimates and goodness of fit of the empirical rehydration models

| Models      | Parameters     | Drying methods |       |       |        |           |       |       |        |              |       |       |        |
|-------------|----------------|----------------|-------|-------|--------|-----------|-------|-------|--------|--------------|-------|-------|--------|
|             |                | Vacuum-dried   |       |       |        | Air-dried |       |       |        | Freeze-dried |       |       |        |
|             |                | 70 °C          | 80 °C | 90 °C | 100 °C | 70 °C     | 80 °C | 90 °C | 100 °C | 70 °C        | 80 °C | 90 °C | 100 °C |
| Peleg       | K <sub>1</sub> | 0.028          | 0.024 | 0.020 | 0.016  | 0.023     | 0.021 | 0.020 | 0.017  | 0.002        | 0.002 | 0.002 | 0.002  |
|             | K <sub>2</sub> | 0.008          | 0.007 | 0.006 | 0.006  | 0.007     | 0.007 | 0.006 | 0.007  | 0.006        | 0.006 | 0.005 | 0.005  |
|             | R <sup>2</sup> | 1.000          | 0.998 | 1.000 | 0.999  | 0.996     | 0.997 | 0.995 | 0.998  | 0.999        | 0.999 | 0.999 | 0.999  |
|             | RMSE           | 0.047          | 0.031 | 0.014 | 0.013  | 0.060     | 0.058 | 0.077 | 0.027  | 0.406        | 0.390 | 0.391 | 0.410  |
|             | $\chi^2$       | 0.256          | 0.096 | 0.016 | 0.012  | 0.337     | 0.348 | 0.466 | 0.060  | 0.337        | 0.348 | 0.466 | 0.060  |
| Weibull     | $\beta$        | 0.576          | 0.634 | 0.724 | 0.718  | 0.512     | 0.520 | 0.487 | 0.659  | 0.552        | 0.581 | 0.643 | 0.618  |
|             | $\alpha$       | 5.705          | 5.366 | 4.561 | 3.955  | 5.335     | 5.004 | 4.837 | 4.551  | 0.630        | 0.645 | 0.650 | 0.587  |
|             | R <sup>2</sup> | 0.996          | 0.999 | 1.000 | 0.999  | 0.994     | 0.994 | 0.992 | 0.998  | 0.998        | 0.998 | 0.995 | 0.999  |
|             | RMSE           | 0.022          | 0.014 | 0.007 | 0.010  | 0.026     | 0.025 | 0.030 | 0.016  | 0.014        | 0.013 | 0.024 | 0.013  |
|             | $\chi^2$       | 0.028          | 0.009 | 0.001 | 0.002  | 0.023     | 0.026 | 0.041 | 0.009  | 0.005        | 0.005 | 0.030 | 0.005  |
| Exponential | k              | 0.367          | 0.345 | 0.333 | 0.373  | 0.424     | 0.433 | 0.465 | 0.368  | 1.290        | 1.290 | 1.319 | 1.390  |
|             | n              | 0.576          | 0.634 | 0.724 | 0.718  | 0.512     | 0.520 | 0.487 | 0.659  | 0.552        | 0.581 | 0.643 | 0.618  |
|             | R <sup>2</sup> | 0.996          | 0.999 | 1.000 | 0.999  | 0.994     | 0.994 | 0.992 | 0.998  | 0.998        | 0.998 | 0.995 | 0.999  |
|             | RMSE           | 0.022          | 0.014 | 0.007 | 0.010  | 0.026     | 0.025 | 0.030 | 0.016  | 0.014        | 0.013 | 0.024 | 0.013  |
|             | $\chi^2$       | 0.028          | 0.009 | 0.001 | 0.002  | 0.023     | 0.026 | 0.041 | 0.009  | 0.005        | 0.005 | 0.030 | 0.005  |
| First order | H              | 0.208          | 0.219 | 0.246 | 0.283  | 0.190     | 0.174 | 0.203 | 0.200  | 1.638        | 1.599 | 1.590 | 1.720  |
|             | R <sup>2</sup> | 0.936          | 0.962 | 0.982 | 0.980  | 0.895     | 0.886 | 0.881 | 0.901  | 0.935        | 0.947 | 0.964 | 0.958  |
|             | RMSE           | 0.090          | 0.074 | 0.051 | 0.053  | 0.111     | 0.105 | 0.118 | 0.069  | 0.082        | 0.075 | 0.068 | 0.069  |
|             | $\chi^2$       | 0.903          | 0.466 | 0.176 | 0.155  | 1.014     | 1.050 | 1.350 | 0.356  | 0.413        | 0.370 | 0.268 | 0.295  |

**Table S2.** Parameter estimates of the Diffusion model

|              | $D_{eff} \times 10^{-8}$<br>(m <sup>2</sup> /s) | <i>Geometric<br/>factor</i> | $R^2$ | <i>RMSE</i> | $\chi^2$ |
|--------------|-------------------------------------------------|-----------------------------|-------|-------------|----------|
| Vacuum-dried |                                                 |                             |       |             |          |
| 70 °C        | 0.837 ± 0.026                                   | 5.847 ± 0.081               | 0.999 | 0.014       | 0.013    |
| 80 °C        | 1.066 ± 0.034                                   | 6.396 ± 0.095               | 0.999 | 0.015       | 0.010    |
| 90 °C        | 1.543 ± 0.036                                   | 7.166 ± 0.086               | 0.999 | 0.011       | 0.006    |
| 100 °C       | 1.768 ± 0.053                                   | 7.151 ± 0.112               | 0.999 | 0.014       | 0.006    |
| Air-dried    |                                                 |                             |       |             |          |
| 70 °C        | 0.707 ± 0.021                                   | 5.304 ± 0.070               | 0.999 | 0.013       | 0.006    |
| 80 °C        | 0.780 ± 0.021                                   | 5.353 ± 0.064               | 0.999 | 0.011       | 0.005    |
| 90 °C        | 0.733 ± 0.031                                   | 5.122 ± 0.097               | 0.998 | 0.018       | 0.015    |
| 100 °C       | 1.347 ± 0.044                                   | 6.618 ± 0.112               | 0.999 | 0.016       | 0.012    |
| Freeze-dried |                                                 |                             |       |             |          |
| 70 °C        | 6.975 ± 0.390                                   | 5.646 ± 0.147               | 0.997 | 0.022       | 0.019    |
| 80 °C        | 7.605 ± 0.385                                   | 5.936 ± 0.143               | 0.997 | 0.020       | 0.015    |
| 90 °C        | 9.163 ± 0.673                                   | 6.539 ± 0.240               | 0.994 | 0.031       | 0.043    |
| 100 °C       | 9.507 ± 0.440                                   | 6.299 ± 0.147               | 0.998 | 0.019       | 0.011    |

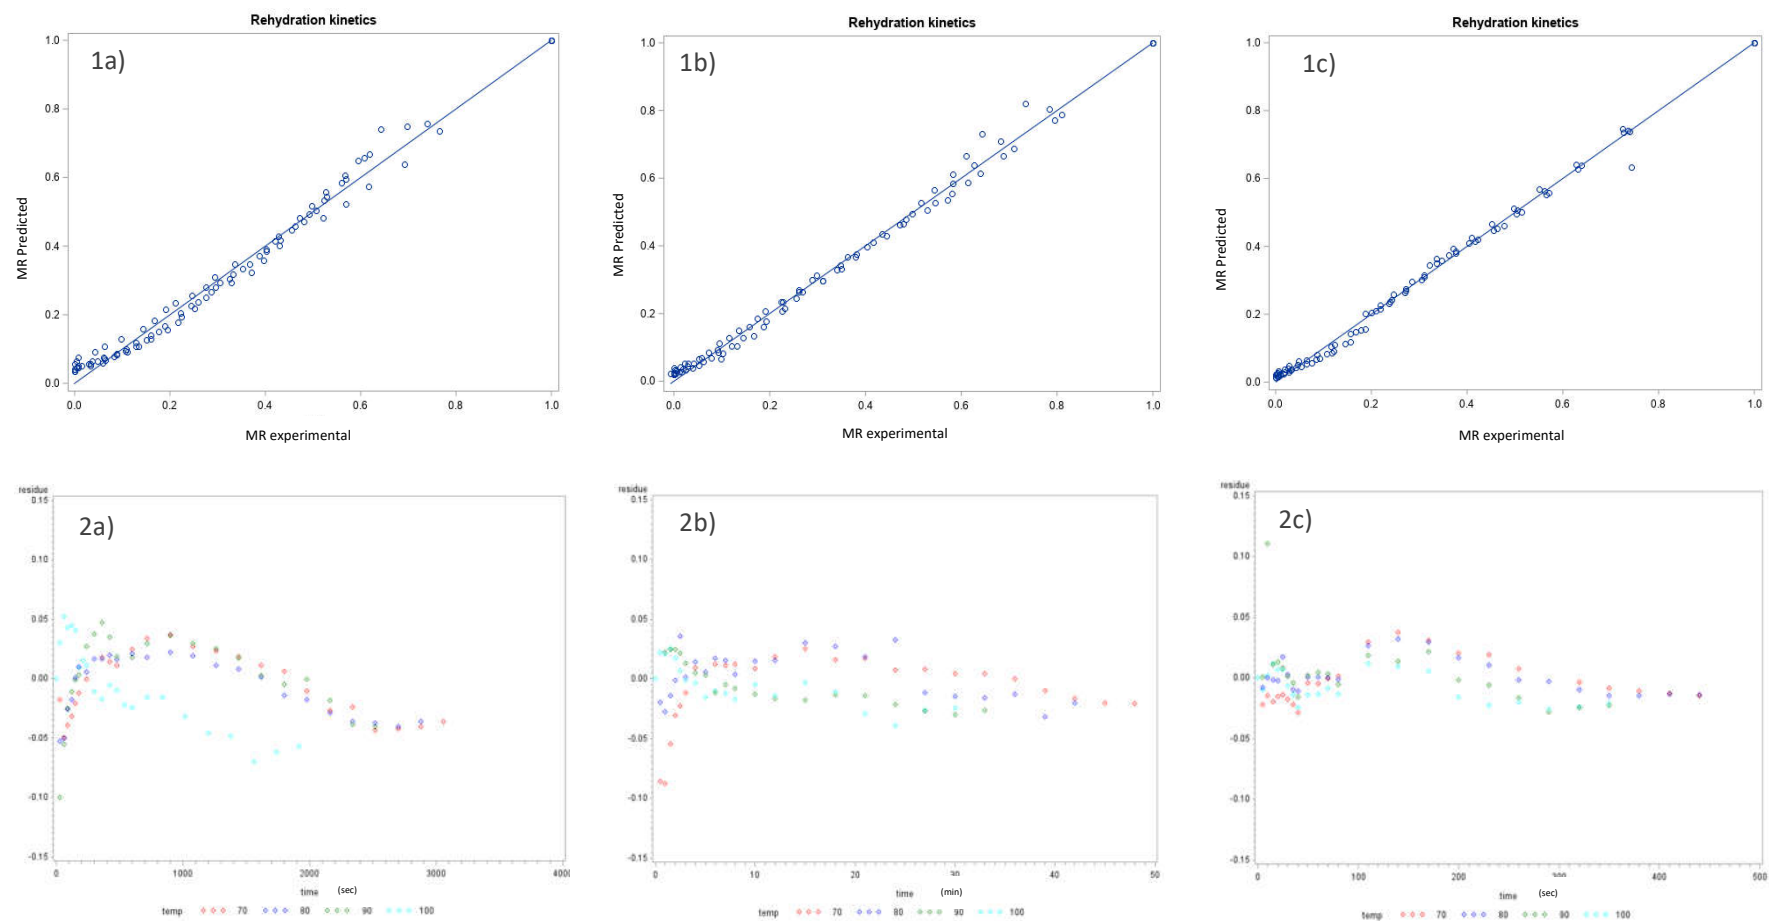

**Figure S1a:** Parity plot (1) and Residues versus time (2) of Weibull model for rehydration data fitting of (a) air-dried, (b) vacuum-dried and (c) freeze-dried beans.

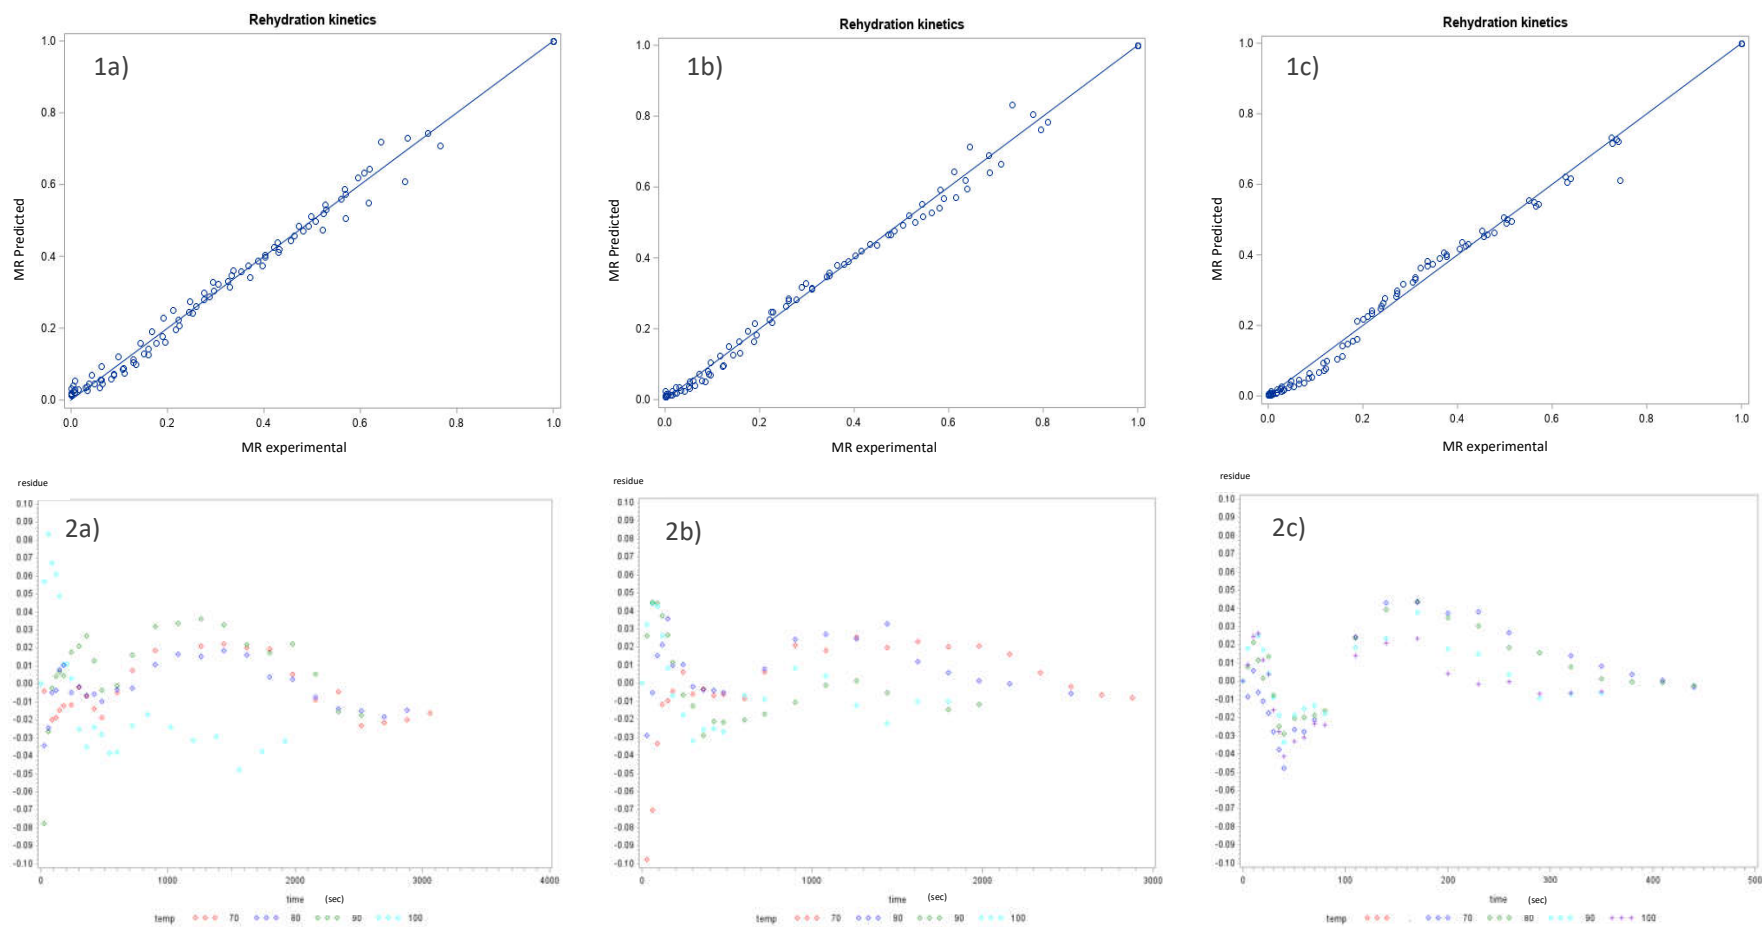

**Figure S1b:** Parity plot (1) and Residues versus time (2) of the diffusion model for rehydration data fitting of (a) air-dried, (b) vacuum-dried and (c) freeze-dried beans
